# Supplementary material
Source: publisher figshare collection journal article supplement (https://rs.figshare.com/ndownloader/files/14949017)
Supplement: Supplementary file 1 [file 14949017]

Supplementary Information

Facile synthesis of reduced Graphene oxide by modified Hummer’s Method as anode material for Li, Na, and K-ion secondary batteries

Jeonggeun Joa, Seulgi Leea, Jihyeon Gima†, Jinju Songa††, Sungjin Kima, Vinod Mathewa, Muhammad Hilmy Alfaruqia, Seokhun Kima, Jinsub Limb and Jaekook Kima*

*a. Department of Materials Science and Engineering, Chonnam National University, 300 Yongbong-dong, Bukgu, Gwangju 61186, Republic of Korea.*

*b. Korea Institute of Industrial Technology(KITECH), Buk-gu, Gwangju 61012, South Korea*

**Fig. S1.** CV curves for the prepared rGO samples versus Li metal anode.

* E-mail: jaekook@chonnam.ac.kr; Fax: +82-62-530-1699; Tel:+82-62-530-1703

† Present address: Chemical Sciences and Engineering Division, Argonne National Laboratory, Lemont, USA

†† Present address: Bio/Energy center, Korea Institute of Energy Research, Gwangju, Korea
